# Supplementary material
Source: publisher figshare collection journal article supplement (https://frontiersin.figshare.com/ndownloader/files/17865953)
Supplement: Supplementary file 1 [file 17865953]

**Appendix 1: Survey questions**

In order to mark open questions an “o” in brackets is put behind the respective questions. For closed questions the response options are listed in brackets:

1) Which urban green spaces do you visit regularly? (o)

2) How often do you visit green spaces? (Daily, few times a week, one time a week, few times a month, one time a year or less)

3) At which daytime do you visit green spaces? (Morning 5:00am -10.00am, noon 10:01am – 2:00pm, afternoon 2:01pm – 6:00pm, evening 6:01pm – 10:00pm)

4) How much time do you spend in urban green spaces on average? (o)

5) Which mean of transportation do you use to visit urban green spaces and how long does it take? (Walking, wheelchair, bike, car, public transport, others)

6) Which route do you use? (o)

7) Are there alternative routes? (o)

8) Which barriers are on your routes? (o)

9) Which improvements can be made on the tracks you use? (o)

10) In how far are barriers limiting the visit of a certain urban green area? (o)

11) In how far do you perceive the following elements as are a barrier or not? (Dustbins, elevators, ticket machines, benches, trees, railway stations, roadworks, bus stops, pedestrian areas, roundabouts, crossings, ramps, stationary traffic, toilets, footways, taxi ranks, stairs, guideposts, showcases, entrees)
